# Supplementary material for: System analysis of cross-talk between nuclear receptors reveals an opposite regulation of the cell cycle by LXR and FXR in human HepaRG liver cells
Source: PubMed Central journal article supplement (PMC6705839; doi:10.1371/journal.pone.0220894), 2019-08-22
Supplement: pone.0220894.s005.pdf [file pone.0220894.s005.pdf]

### A. 24h diploid

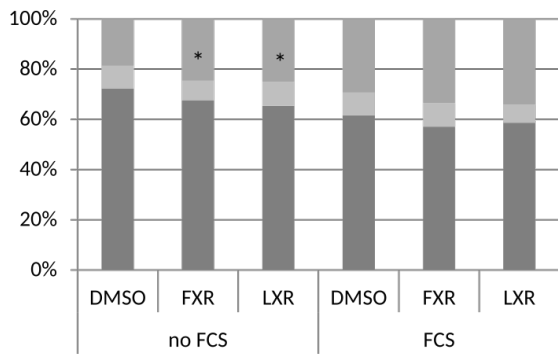

### B. 24h tetraploid

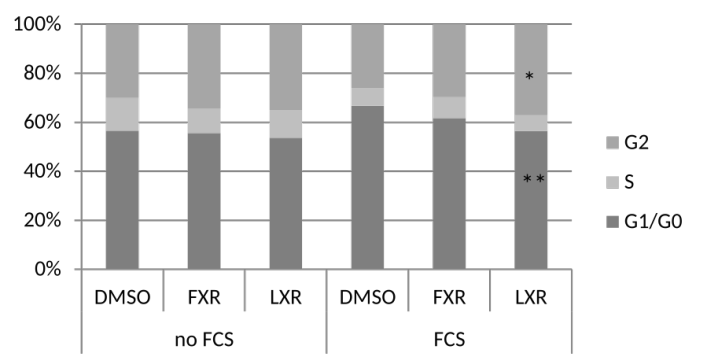

### C. 48h diploid

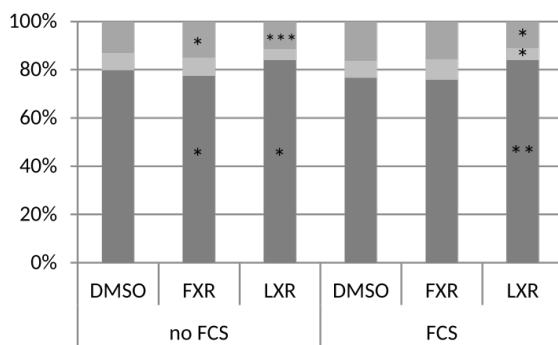

### D. 48h tetraploid

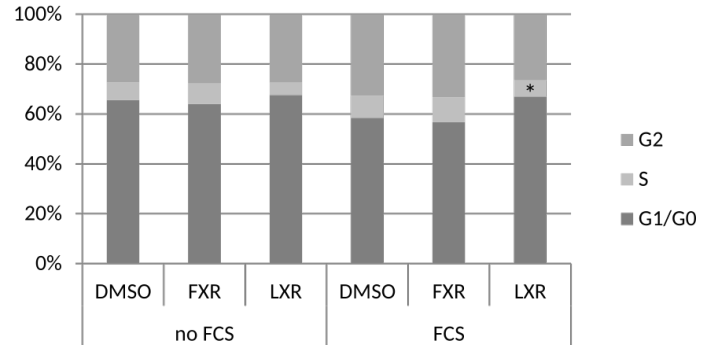

## S5 Fig. FXR and LXR affect the cell progression and the ploidy of HepaRG cells.

The cell cycle distribution and the ploidy were analyzed by PI staining and FACS. (A, B) show the cell cycle distribution at 24h of treatment with DMSO, FXR-L 1 uM or LXR-L 2 uM. (C, D) show the cell cycle distribution at 48h with the different treatments. \* : p-value < 0.05, \*\* < 0.01, \*\*\* < 0.001 versus DMSO (Student's t test). N=8.
