# Supplementary material for: System analysis of cross-talk between nuclear receptors reveals an opposite regulation of the cell cycle by LXR and FXR in human HepaRG liver cells
Source: PubMed Central journal article supplement (PMC6705839; doi:10.1371/journal.pone.0220894), 2019-08-22
Supplement: pone.0220894.s006.pdf [file pone.0220894.s006.pdf]

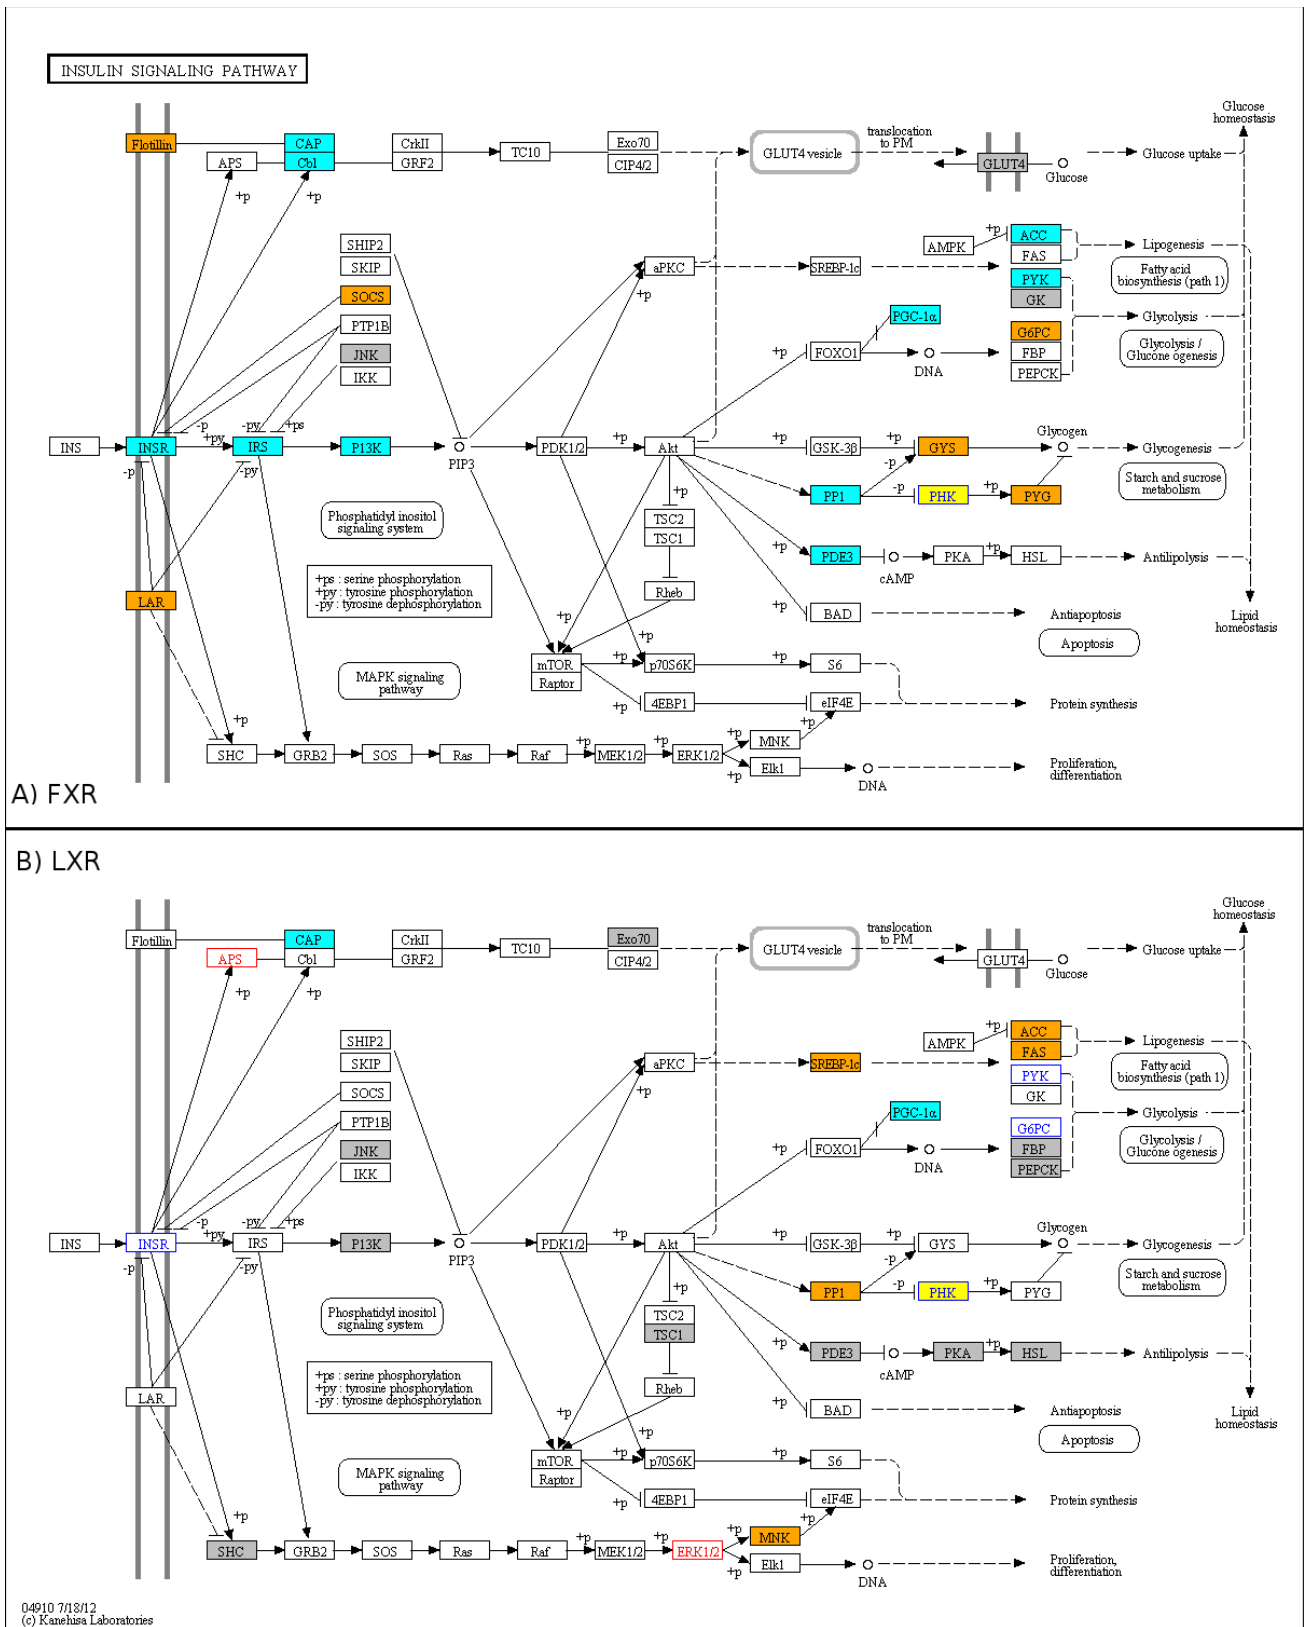

**S6 Fig. Effect of the FXR-L and LXR-L treatments on the KEGG Insulin pathways.** (A) The genes in the leading edge for FXR-L treatment at 24h are highlighted, as in main Fig 3 (blue for down-regulations, orange for up-regulations). (B) Same image for the LXR-L treatment at 24h.
