# Supplementary material for: System analysis of cross-talk between nuclear receptors reveals an opposite regulation of the cell cycle by LXR and FXR in human HepaRG liver cells
Source: PubMed Central journal article supplement (PMC6705839; doi:10.1371/journal.pone.0220894), 2019-08-22
Supplement: pone.0220894.s008.pdf [file pone.0220894.s008.pdf]

4h, FXR-L

| <i>Affymetrix Probe ID</i> | Gene Symbol  | log2 Fold Change | Fold Change | t statistic | P-value  | adj. P-value |
|----------------------------|--------------|------------------|-------------|-------------|----------|--------------|
| 8131803                    | <b>IL6</b>   | 4.06             | 16.67       | 29.09       | 9.55E-18 | 1.94E-13     |
| 8054722                    | <b>IL1B</b>  | 0.98             | 1.97        | 8.6         | 4.01E-08 | 1.00E-05     |
| 7903786                    | <b>CSF1</b>  | 0.87             | 1.83        | 7.19        | 6.12E-07 | 9.40E-05     |
| 7980316                    | <b>TGFB3</b> | 0.7              | 1.62        | 6.24        | 4.44E-06 | 0.00049209   |
| 7994280                    | <b>IL4R</b>  | 0.69             | 1.62        | 5.64        | 1.66E-05 | 0.00145666   |
| 8107887                    | <b>CSF2</b>  | 0.48             | 1.39        | 4.99        | 7.22E-05 | 0.00454671   |

**S2 Table. IL6 and other proinflammatory cytokines upregulated by FXR-L at 4h.**

Statistical test results for IL6 and a number of other proinflammatory cytokines from the comparison of FXR-L-treated cells and control cells (untreated and DMSO treated) at 4h. This table is an excerpt of the complete result table, which is provided in S1 File (genes/FXR\_4h.txt). Results are from the differential gene expression analysis described in Materials and Methods.
